# Supplementary material for: Local steroid activation is a critical mediator of the anti-inflammatory actions of therapeutic glucocorticoids
Source: PubMed Central journal article supplement (PMC7815637; doi:10.1136/annrheumdis-2020-218493), 2020-11-08
Supplement: annrheumdis-2020-218493supp002.pdf [file annrheumdis-2020-218493supp002.pdf]

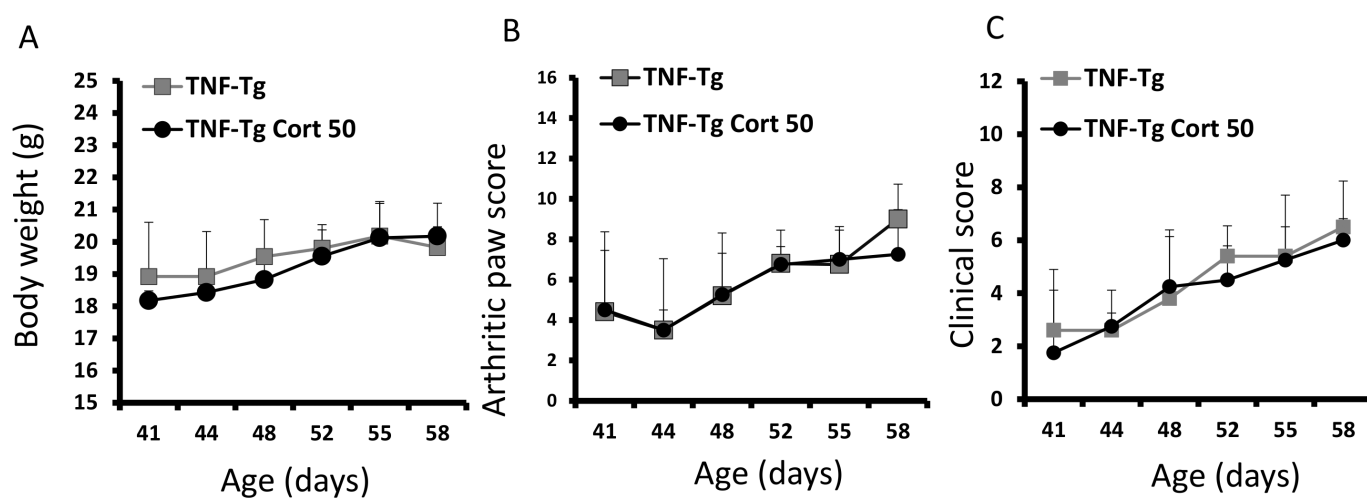

**Supplementary Figure 1:** (A), Body weights, (B) Total clinical scores (AU), (C) arthritic paw scores (AU) of WT, TNF-tg animals receiving either vehicle or corticosterone (50  $\mu\text{g}/\text{ml}$ ) in the drinking water for 3 weeks. Values are expressed as mean  $\pm$  standard error,  $n=3$  per group. Statistical significance was determined using two-way ANOVA with Tukey post hoc analysis. \* $P < 0.05$ , \*\* $P < 0.005$ , \*\*\* $P < 0.001$ .
