# Supplementary figures and images for: Local steroid activation is a critical mediator of the anti-inflammatory actions of therapeutic glucocorticoids
Source: HighWire-hosted journal article supplement (doi:10.1136/annrheumdis-2020-218493), 2020-11-08

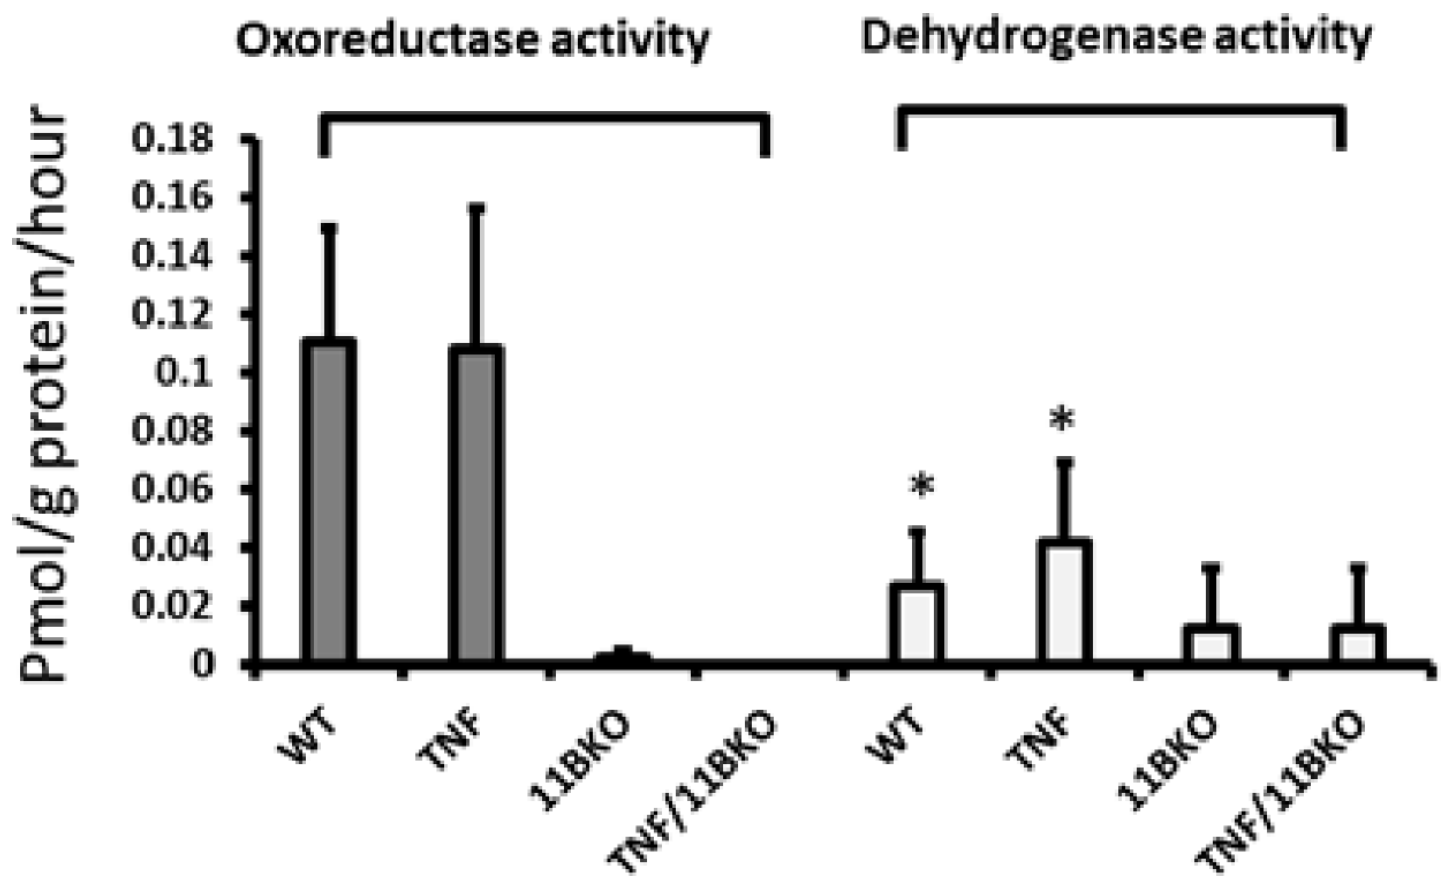

Supplement: annrheumdis-2020-218493supp003_data_supplement.pdf [file annrheumdis-2020-218493supp003_data_supplement.pdf]
